# Supplementary material for: Self-Reported Versus Observed Measures: Validation of Child Caregiver Food Hygiene Practices in Rural Malawi
Source: PubMed Central journal article supplement (PMC7344643; doi:10.3390/ijerph17124498), 2020-06-23
Supplement: ijerph-17-04498-s001.pdf [file ijerph-17-04498-s001.pdf]

**Structured Observation Checklist  
(Household)**

**Informed Consent Form**

Good morning! My name is \_\_\_\_\_. I am working for ....., a non-profit, non-governmental organization, based in ....., Currently, we are conducting the study on “.....” in x districts of ..... (.....) for WASHTED and SHARE.

The main objective of this study is to learn on how you care for child during the day. In order to do so, we would like to observe your daily activities for about 6 hours. We will observe in those houses of mother (or primary care takers of children if mother is not available) who have child aged 18-59 months. Your participation is voluntary. You can stop at any point during the observation.

We would be grateful if you allow us for the observation since this observation will be extremely important and will contribute to our study. During the observation you do not need to do any additional thing just continue your normal/routine day practices/work.

Do you have any questions?      Yes      No  
 Do I have your consent to begin the observation now?    Yes    No

| <b>Observers visits record</b>                              |                                                                                                                                                                                                                                        |       |       |
|-------------------------------------------------------------|----------------------------------------------------------------------------------------------------------------------------------------------------------------------------------------------------------------------------------------|-------|-------|
| Date of interview                                           |                                                                                                                                                                                                                                        |       |       |
| Household ID                                                |                                                                                                                                                                                                                                        |       |       |
| Name of observer                                            | .....                                                                                                                                                                                                                                  | ..... | ..... |
| Observation result                                          | Observation completed.....1<br>Not met concerned person for observation.....2<br>Said to observe next time.....3<br>Nobody met at home .....4<br>Observation Incomplete.....5<br>Refused for observation.....6<br>Other (specify)..... |       |       |
| <i>(Instruction; please mention reason behind refusing)</i> |                                                                                                                                                                                                                                        |       |       |

**Note for observer:** Please make the purpose of your visit anonymous. Don't use structured observation checklist in-front of mother. Only use notebook to make notes and record observed behaviours during structured observation. Don't give any signal/clue that you are observing mother's hygiene key behaviours. You will only mention your purpose of visit is to know the 'daily routine of mothers and to know the diarrhoea status of their children aged between 18-59 months in last two week'. Make sure that you are observing mother's hygiene behaviour in-between 6-12 noon and mark in the checklist accordingly. Only observe one household per day.

**Structured observation starts at 6am or 1pm:**

**Note for observer:** don't ask any question to mother. Only observe mother or primary care takers of children if mother is not available) behaviours but not the behaviours of other family members in house. If mother (or primary care taker) is not available at home, go to next participating household. If mother (or primary care taker) is available at home, briefly talk about her daily routine or any other local functions/rituals but don't talk too much. Observe behaviours as reflected in the structured observation checklist below. Only circle the correct answer soonest after you complete the observation in respective house.

**Section 1: Household/Cluster Identification**

| Q. N | Question      | Response                                           | Code | Instruction |
|------|---------------|----------------------------------------------------|------|-------------|
| 1    | District name | <input type="text"/> <input type="text"/><br>_____ |      |             |
|      | TA name       | <input type="text"/> <input type="text"/>          |      |             |
| 104  | Village name  |                                                    |      |             |

Observe the behavioural practices of mother or primary caretakers of children having children from 18-59 months

Now I am going to start my observational works.

| Water storage and treatment practice |                                                                                                       |                                  |      |             |
|--------------------------------------|-------------------------------------------------------------------------------------------------------|----------------------------------|------|-------------|
| Q.N                                  | Questions                                                                                             | Response                         | Code | Instruction |
| 1.                                   | What is the main source of drinking water used by the household?                                      | Piped water in residence         | 1    |             |
|                                      |                                                                                                       | Piped water to tap in yard, plot | 2    |             |
|                                      |                                                                                                       | Borehole                         | 3    |             |
|                                      |                                                                                                       | Protected spring                 | 4    |             |
|                                      |                                                                                                       | Surface water                    | 5    |             |
|                                      |                                                                                                       | Water vendor                     | 6    |             |
|                                      |                                                                                                       | Other (specify).....             |      |             |
| 2.                                   | What is the main source of water for domestic purposes (e.g. washing utensils) used by the household? | Piped water in residence         | 1    |             |
|                                      |                                                                                                       | Piped water to tap in yard, plot | 2    |             |
|                                      |                                                                                                       | Borehole                         | 3    |             |
|                                      |                                                                                                       | Protected spring                 | 4    |             |
|                                      |                                                                                                       | Surface water                    | 5    |             |
|                                      |                                                                                                       | Water vendor                     | 6    |             |
|                                      |                                                                                                       | Other (specify).....             |      |             |
| 3.                                   | How is drinking water stored within the household?                                                    | Covered Barrel                   | 1    |             |
|                                      |                                                                                                       | Open barrel                      | 2    |             |
|                                      |                                                                                                       | Covered bucket                   | 3    |             |
|                                      |                                                                                                       | Open Bucket                      | 4    |             |
|                                      |                                                                                                       | Covered Mtsuko                   | 5    |             |
|                                      |                                                                                                       | Open mtsuko                      | 6    |             |
|                                      |                                                                                                       | Other (Specify).....             | 99   |             |
| 4.                                   | How is water for other domestic purposes (e.g. for washing utensils) stored within the household?     | Covered Barrel                   | 1    |             |
|                                      |                                                                                                       | Open barrel                      | 2    |             |
|                                      |                                                                                                       | Covered bucket                   | 3    |             |
|                                      |                                                                                                       | Open Bucket                      | 4    |             |
|                                      |                                                                                                       | Covered Mtsuko                   | 5    |             |
|                                      |                                                                                                       | Open mtsuko                      | 6    |             |
|                                      |                                                                                                       | Other (Specify).....             | 99   |             |

|     |                                                                                                                                                                                                                       |                                     |    |  |
|-----|-----------------------------------------------------------------------------------------------------------------------------------------------------------------------------------------------------------------------|-------------------------------------|----|--|
| 5.  | What is the condition of the stored water?<br>(Clean means absence of clay, mud, turbidity in water, things like dust, animal hair, insects and any visible residue, color objects in or on the surface of the water) | Visibly Clean                       | 1  |  |
|     |                                                                                                                                                                                                                       | Visibly Dirty                       | 0  |  |
| 6.  | What is used to wash the storage container                                                                                                                                                                            | Water only                          | 1  |  |
|     |                                                                                                                                                                                                                       | Water and soap                      | 2  |  |
|     |                                                                                                                                                                                                                       | Water and mud                       | 3  |  |
|     |                                                                                                                                                                                                                       | Water and ash                       | 4  |  |
|     |                                                                                                                                                                                                                       | Others (specify)                    | 99 |  |
| 7.  | What is used to wash the water collection container                                                                                                                                                                   | Water only                          | 1  |  |
|     |                                                                                                                                                                                                                       | Water and soap                      | 2  |  |
|     |                                                                                                                                                                                                                       | Water and mud                       | 3  |  |
|     |                                                                                                                                                                                                                       | Water and ash                       | 4  |  |
|     |                                                                                                                                                                                                                       | Others (specify)                    | 99 |  |
| 8.  | Where is drinking water storage container placed within the household                                                                                                                                                 | Inside the house on a raised place  | 1  |  |
|     |                                                                                                                                                                                                                       | Inside the house on the floor       | 2  |  |
|     |                                                                                                                                                                                                                       | Outside the house on a raised place | 3  |  |
|     |                                                                                                                                                                                                                       | Outside the house on the ground     | 4  |  |
|     |                                                                                                                                                                                                                       | Others (specify)                    | 99 |  |
| 9.  | Where is water storage container with water for domestic purposes (e.g. water for cleaning utensils) placed within the household                                                                                      | Inside the house on a raised place  | 1  |  |
|     |                                                                                                                                                                                                                       | Inside the house on the floor       | 2  |  |
|     |                                                                                                                                                                                                                       | Outside the house on a raised place | 3  |  |
|     |                                                                                                                                                                                                                       | Outside the house on the ground     | 4  |  |
|     |                                                                                                                                                                                                                       | Others (specify)                    | 99 |  |
| 10. | Are drinking water containers/pots properly covered with covering lid?<br>(Properly covered means complete covering of the container)                                                                                 | Yes                                 | 1  |  |
|     |                                                                                                                                                                                                                       | No                                  | 0  |  |
| 11. | Can drinking water be accessed by animals                                                                                                                                                                             | Yes                                 | 1  |  |
|     |                                                                                                                                                                                                                       | No                                  | 0  |  |
| 12. | Was drinking water accessed by animals during observation period                                                                                                                                                      | Yes                                 | 1  |  |
|     |                                                                                                                                                                                                                       | No                                  | 0  |  |

|     |                                                                                                      |                |    |  |
|-----|------------------------------------------------------------------------------------------------------|----------------|----|--|
| 13. | Can water for other domestic purposes (e.g. washing utensils) be accessed by animals                 | Yes            | 1  |  |
|     |                                                                                                      | No             | 0  |  |
| 14. | Was water for other domestic purposes (e.g. washing utensils) accessed by animals during observation | Yes            | 1  |  |
|     |                                                                                                      | No             | 0  |  |
| 15. | Which animals accessed the water                                                                     | Poultry        | 1  |  |
|     |                                                                                                      | Pig            | 2  |  |
|     |                                                                                                      | Goat           | 3  |  |
|     |                                                                                                      | Cow            | 4  |  |
|     |                                                                                                      | Dog            | 5  |  |
|     |                                                                                                      | Cat            | 6  |  |
|     |                                                                                                      | Others specify | 99 |  |
| 16. | How do they get the drinking water (e.g. using two cup system, one cup)<br>Explain in detail         |                |    |  |

### Sanitation and faeces management

|     |                                                                                                                                                                   |     |    |  |
|-----|-------------------------------------------------------------------------------------------------------------------------------------------------------------------|-----|----|--|
| 17. | Does the household have a toilet?                                                                                                                                 | Yes | 1  |  |
|     |                                                                                                                                                                   | No  | 0  |  |
| 18. | Does the toilet have a drop hole cover                                                                                                                            | Yes | 1  |  |
|     |                                                                                                                                                                   | No  | 0  |  |
| 19. | Assess condition of toilet by observing the following:<br><i>(Instruction: "Clean" means that the floor, drop hole and walls of the toilet are visibly clean)</i> | Yes | No |  |
|     |                                                                                                                                                                   | 1   | 0  |  |
| A   | <i>Floor of toilet</i>                                                                                                                                            | 1   | 0  |  |
| B   | <i>Drop hole surrounding</i>                                                                                                                                      | 1   | 0  |  |
| C   | <i>Wall of toilet</i>                                                                                                                                             | 1   | 0  |  |
| D   | <i>Flies seen</i>                                                                                                                                                 | 1   | 0  |  |
| E   | <i>Bad smelling</i>                                                                                                                                               | 1   | 0  |  |

|     |                                                                                                                                                  |           |   |  |
|-----|--------------------------------------------------------------------------------------------------------------------------------------------------|-----------|---|--|
| 20. | Do all the family members use the toilet while they are at house?<br><i>(Instruction: if all members use toilet put 'always', if few and few</i> | Always    | 1 |  |
|     |                                                                                                                                                  | Sometimes | 2 |  |
|     |                                                                                                                                                  | Never     | 3 |  |

|                     |                                                                                                                                   |                                                      |    |  |
|---------------------|-----------------------------------------------------------------------------------------------------------------------------------|------------------------------------------------------|----|--|
|                     | <i>not 'sometimes' and 'never' – if no one used it)</i>                                                                           |                                                      |    |  |
| 21.                 | Is human faeces' observed in the household premises?                                                                              | Yes                                                  | 1  |  |
|                     |                                                                                                                                   | No                                                   | 0  |  |
| 22.                 | Where child aged 18 - 59 months defecate?                                                                                         | In open place (anywhere)                             | 1  |  |
|                     |                                                                                                                                   | Potties                                              | 2  |  |
|                     |                                                                                                                                   | Nappies/diapers                                      | 3  |  |
|                     |                                                                                                                                   | Clothes                                              | 4  |  |
|                     |                                                                                                                                   | Others (Specify).....                                |    |  |
| 23.                 | How the child's faeces disposed?                                                                                                  | Picked up and disposed in toilet                     | 1  |  |
|                     |                                                                                                                                   | Picked up and disposed in dumping side               | 2  |  |
|                     |                                                                                                                                   | Left as it is                                        | 3  |  |
|                     |                                                                                                                                   | Covered with soil                                    | 4  |  |
|                     |                                                                                                                                   | Throw anywhere                                       | 5  |  |
|                     |                                                                                                                                   | Wash in bucket                                       | 6  |  |
|                     |                                                                                                                                   | Others (specify).....                                |    |  |
| 24.                 | If disposed in toilet, what is used to carry the faeces                                                                           | Hoe                                                  | 1  |  |
|                     |                                                                                                                                   | Leaves                                               | 2  |  |
|                     |                                                                                                                                   | Piece of metal                                       | 3  |  |
|                     |                                                                                                                                   | Piece of paper                                       | 4  |  |
|                     |                                                                                                                                   | Bare hands                                           | 5  |  |
|                     |                                                                                                                                   | Others (specify)                                     | 99 |  |
| 25.                 | If faeces were removed from where the child defecated and disposed somewhere, are some faeces still remain on the disposal place? | yes                                                  | 1  |  |
|                     |                                                                                                                                   | No                                                   | 0  |  |
| 26.                 | How are soiled nappies/clothes treated                                                                                            | Washed immediately when soiled                       | 1  |  |
|                     |                                                                                                                                   | Packed in bucket to be washed later                  | 2  |  |
|                     |                                                                                                                                   | Packed on another place e.g. roof to be washed later | 3  |  |
|                     |                                                                                                                                   | Others specify                                       | 99 |  |
| <b>Hand Washing</b> |                                                                                                                                   |                                                      |    |  |
| 27.                 | Is there a specific hand washing station/area?                                                                                    | Yes                                                  | 1  |  |
|                     |                                                                                                                                   | No                                                   | 0  |  |

|     |                                                                      |                                 |    |  |
|-----|----------------------------------------------------------------------|---------------------------------|----|--|
| 28. | What is the location of the handwashing facility                     | Inside or near the latrine      | 1  |  |
|     |                                                                      | Under the dish rack             | 2  |  |
|     |                                                                      | near the cooking place/fire     | 3  |  |
|     |                                                                      | Elsewhere inside the house      | 4  |  |
|     |                                                                      | Outside the house near the door | 5  |  |
|     |                                                                      | Elsewhere in the compound       | 6  |  |
|     |                                                                      | Others (Specify)                | 99 |  |
| 29. | Are soap and water available in the hand washing station/area?       | Only Soap                       | 1  |  |
|     |                                                                      | Only Water                      | 2  |  |
|     |                                                                      | Both Soap and Water available   | 3  |  |
|     |                                                                      | Both Soap and Water unavailable | 4  |  |
|     |                                                                      | Ash and water                   | 5  |  |
|     |                                                                      | Other(Specify).....             |    |  |
| 30. | What type of soap is it?                                             | Liquid soap                     | 1  |  |
|     |                                                                      | Bar soap                        | 2  |  |
|     |                                                                      | Powdered soap                   | 3  |  |
|     |                                                                      | Ash                             | 4  |  |
|     |                                                                      | Flour                           | 5  |  |
|     |                                                                      | Others (Specify)                | 99 |  |
| 31. | Is anyone at the household wearing a handwashing with soap bracelet? | Yes                             | 1  |  |
|     |                                                                      | No                              | 0  |  |
| 32. | If yes, who is wearing the bracelet                                  | Mother                          | 1  |  |
|     |                                                                      | Father                          | 2  |  |
|     |                                                                      | Grandmother                     | 3  |  |
|     |                                                                      | Grandfather                     | 4  |  |
|     |                                                                      | Sibling                         | 5  |  |
|     |                                                                      | Others (Specify)                | 99 |  |

### Food Storage and Food Hygiene

|     |                                                                                                           |                  |     |                |
|-----|-----------------------------------------------------------------------------------------------------------|------------------|-----|----------------|
| 33. | Where is food mostly prepared at the household                                                            | Kitchen          | 1   |                |
|     |                                                                                                           | Veranda          | 2   |                |
|     |                                                                                                           | Household yard   | 3   |                |
|     |                                                                                                           | Inside the house | 4   |                |
|     |                                                                                                           | Others (specify) | 99  |                |
| 34. | Observe steps followed when preparing porridge for the child<br>(insert the number in order of responses) |                  | No. | How many times |

*Kodi mungandiuze ndondomeko yomwe mumatsatira mukamakonza chakudya chanu (kuyambira poyamba mpaka pamapeto)*

|                                          |  |  |
|------------------------------------------|--|--|
| Wash pot and other utensils with soap    |  |  |
| Wash pot and other utensils without soap |  |  |
| Put washed utensils on raised place      |  |  |
| Put washed utensils on lower place       |  |  |
| Set up fire                              |  |  |
| Caregiver wash hands with soap           |  |  |
| Wash hands without soap                  |  |  |
| Add water in pot and put it on fire      |  |  |
| Cooking porridge: add flour & stir       |  |  |
| Remove pot from fire                     |  |  |
| Pot with porridge covered                |  |  |
| Serve porridge in clean washed utensils  |  |  |
| Serve porridge in dirty plate            |  |  |



|     |                              |                                     |    |  |
|-----|------------------------------|-------------------------------------|----|--|
|     |                              | Caregiver washed hands with soap    |    |  |
|     |                              | Child washed hands with soap        |    |  |
|     |                              | Caregiver washed hands without soap |    |  |
|     |                              | Child washed hands without soap     |    |  |
|     |                              | Feed the child porridge with spoon  |    |  |
|     |                              | Feed the child with hand            |    |  |
|     |                              | Child self-feeding with spoon       |    |  |
|     |                              | Child self – feeding with hands     |    |  |
| 35. | Who prepares child food      | Mother                              | 1  |  |
|     |                              | Father                              | 2  |  |
|     |                              | Grand mother                        | 3  |  |
|     |                              | Grand father                        | 4  |  |
|     |                              | Sibling                             | 5  |  |
|     |                              | Others                              | 99 |  |
| 36. | Who feeds the child porridge | Mother                              | 1  |  |
|     |                              | Father                              | 2  |  |
|     |                              | Grand mother                        | 3  |  |
|     |                              | Grand father                        | 4  |  |
|     |                              | Sibling                             | 5  |  |

|     |                                                                              |                      |     |  |
|-----|------------------------------------------------------------------------------|----------------------|-----|--|
|     |                                                                              | Self-feeding         | 6   |  |
|     |                                                                              | Others               | 99  |  |
| 37. | Who feeds the child lunch (e.g. nsima)                                       | Mother               | 1   |  |
|     |                                                                              | Father               | 2   |  |
|     |                                                                              | Grand mother         | 3   |  |
|     |                                                                              | Grand father         | 4   |  |
|     |                                                                              | Sibling              | 5   |  |
|     |                                                                              | Self-feeding         | 6   |  |
|     |                                                                              | Others               | 99  |  |
|     |                                                                              | Not observed         | 101 |  |
| 38. | By any chance, have you observed a baby bib being used during child feeding? | Yes                  | 1   |  |
|     |                                                                              | No                   | 0   |  |
| 39. | What lunch was served                                                        |                      |     |  |
| 40. | Was lunch freshly prepared or stored (i.e. both relish and nsima/rice)       |                      |     |  |
| 41. | Who feeds the child snacks and fruits                                        | Mother               | 1   |  |
|     |                                                                              | Father               | 2   |  |
|     |                                                                              | Grand mother         | 3   |  |
|     |                                                                              | Grand father         | 4   |  |
|     |                                                                              | Sibling              | 5   |  |
|     |                                                                              | Self-feeding         | 6   |  |
|     |                                                                              | Others               | 99  |  |
|     |                                                                              | Not observed         | 101 |  |
| 42. | What type of snacks were given to the child                                  |                      |     |  |
| 43. | Were the snacks clean? E.g. washed                                           |                      |     |  |
| 44. | What is used when child is eating porridge                                   | Spoon                | 1   |  |
|     |                                                                              | Hand                 | 2   |  |
|     |                                                                              | cup                  | 3   |  |
|     |                                                                              | Plate                | 4   |  |
|     |                                                                              | Both spoon and hands | 99  |  |
| 45. | Is any cooked leftover/stored food at home/Kitchen observed?                 | Yes                  | 1   |  |

|     |                                                                                                                                                                                                                                                                                                                                                                             |                  |     |  |
|-----|-----------------------------------------------------------------------------------------------------------------------------------------------------------------------------------------------------------------------------------------------------------------------------------------------------------------------------------------------------------------------------|------------------|-----|--|
|     | (Note: Make sure that you will observe all the potential areas of food storage.)                                                                                                                                                                                                                                                                                            | No               | 0   |  |
| 46. | What type of left-over food has been stored                                                                                                                                                                                                                                                                                                                                 | Nsima            | 1   |  |
|     |                                                                                                                                                                                                                                                                                                                                                                             | Porridge         | 2   |  |
|     |                                                                                                                                                                                                                                                                                                                                                                             | Relish           | 3   |  |
|     |                                                                                                                                                                                                                                                                                                                                                                             | Potatoes         | 4   |  |
|     |                                                                                                                                                                                                                                                                                                                                                                             | Cassava          | 5   |  |
|     |                                                                                                                                                                                                                                                                                                                                                                             | Sorghum          | 6   |  |
|     |                                                                                                                                                                                                                                                                                                                                                                             | millet           | 7   |  |
|     |                                                                                                                                                                                                                                                                                                                                                                             | Rice             | 8   |  |
|     |                                                                                                                                                                                                                                                                                                                                                                             | Others (specify) | 99  |  |
| 47. | Is leftover/stored food/cooked food kept covered with covering lid?<br>(Note: If all foods were covered then only mark as Yes. If some covered and some not then mark No)                                                                                                                                                                                                   | Yes              | 1   |  |
|     |                                                                                                                                                                                                                                                                                                                                                                             | No               | 0   |  |
|     |                                                                                                                                                                                                                                                                                                                                                                             | Some             | 2   |  |
| 48. | Is the covering lid of leftover/ stored/ cooked food clean?<br>(Clean means free from dirt, dust, flies and insects)                                                                                                                                                                                                                                                        | Yes              | 1   |  |
|     |                                                                                                                                                                                                                                                                                                                                                                             | No               | 0   |  |
| 49. | Is leftover food re-heated before feeding to child?                                                                                                                                                                                                                                                                                                                         | Yes              | 1   |  |
|     |                                                                                                                                                                                                                                                                                                                                                                             | No               | 0   |  |
|     |                                                                                                                                                                                                                                                                                                                                                                             | Not observed     | 101 |  |
| 50. | Is the stored food thoroughly reheated before feeding?<br>(Note: Thoroughly re-heat means, observation of time taken to re-heat. Time might vary by types of food, volume of food and intensity of fire. Liquid food should be rolling boiled and in case of solid food there should be visible steam coming from food. If food is re-heated in bowl or plate, circle 'no') | Yes              | 1   |  |
|     |                                                                                                                                                                                                                                                                                                                                                                             | No               | 0   |  |
|     |                                                                                                                                                                                                                                                                                                                                                                             | Not observed     | 101 |  |
| 51. | Are serving utensils (plate, bowl, glass and spoon) clean before serving food?<br>(Instruction: This evidence can be seen multiple times. If mother missed at any times, please write 'no' )                                                                                                                                                                                | Yes              | 1   |  |
|     |                                                                                                                                                                                                                                                                                                                                                                             | No               | 0   |  |
|     |                                                                                                                                                                                                                                                                                                                                                                             | sometimes        | 2   |  |
| 52. | If yes, what was used to wash the utensils? (Observe at all times when the utensils are being washed)                                                                                                                                                                                                                                                                       |                  |     |  |

|     |                                                      |                                  |    |  |
|-----|------------------------------------------------------|----------------------------------|----|--|
| 53. | Are cooked and uncooked foods kept separately?       | Yes                              | 1  |  |
|     |                                                      | No                               | 0  |  |
| 54. | Where are the utensils kept when inside the house    | On the floor                     | 1  |  |
|     |                                                      | In basin on the floor            | 2  |  |
|     |                                                      | On top of a bag of maize, millet | 3  |  |
|     |                                                      | In basin on a chair              | 4  |  |
|     |                                                      | On a modern dish rack            | 5  |  |
|     |                                                      | In basin on a crate              | 6  |  |
|     |                                                      | In cupboard                      | 7  |  |
|     |                                                      | Others (specify):                | 99 |  |
| 55. | Can the utensils accessed by animals on this place   | Yes                              | 1  |  |
|     |                                                      | No                               | 0  |  |
| 56. | Is there a dish rack at the household                | Yes                              | 1  |  |
|     |                                                      | No                               | 0  |  |
| 57. | Where are the utensils kept when outside the house   | On the ground                    | 1  |  |
|     |                                                      | In basin on the ground           | 2  |  |
|     |                                                      | In basin on a chair              | 3  |  |
|     |                                                      | On a modern dish rack            | 4  |  |
|     |                                                      | On Thandala                      | 5  |  |
|     |                                                      | In basin on a crate              | 6  |  |
|     |                                                      | Others (specify)                 | 99 |  |
| 58. | Can domestic animals access utensils from this place | Yes                              | 1  |  |
|     |                                                      | No                               | 0  |  |
| 59. | Are there domestic animals at the household          | Yes                              | 1  |  |

|     |                                                                                       |                  |    |  |
|-----|---------------------------------------------------------------------------------------|------------------|----|--|
|     |                                                                                       | No               | 0  |  |
| 60. | What domestic animals are present                                                     | Poultry          | 1  |  |
|     |                                                                                       | Pig              | 2  |  |
|     |                                                                                       | Cattle           | 3  |  |
|     |                                                                                       | Goat             | 4  |  |
|     |                                                                                       | Sheep            | 5  |  |
|     |                                                                                       | Dog              | 6  |  |
|     |                                                                                       | Cat              | 7  |  |
|     |                                                                                       | Others           | 99 |  |
| 61. | Are animal faeces present inside the house                                            | Yes              | 1  |  |
|     |                                                                                       | No               | 0  |  |
| 62. | Are animal faeces present outside the house                                           | Yes              | 1  |  |
|     |                                                                                       | No               | 0  |  |
| 63. | The droppings are from which animals?                                                 |                  |    |  |
| 64. | Observe if the household has a raised place for storage of utensils inside the house? | Yes              | 1  |  |
|     |                                                                                       | No               | 0  |  |
| 65. | Have you observed if the food hygiene buntings are hanged anywhere?                   | Yes              | 1  |  |
|     |                                                                                       | No               | 0  |  |
| 66. | If yes where exactly are they hanged?                                                 | Window           | 1  |  |
|     |                                                                                       | Door             | 2  |  |
|     |                                                                                       | Sitting room     | 3  |  |
|     |                                                                                       | Kitchen          | 4  |  |
|     |                                                                                       | Veranda          | 5  |  |
|     |                                                                                       | Others (Specify) | 99 |  |
| 67. | By any chance have you seen a Banja la ukhondo badge?                                 | Yes              | 1  |  |
|     |                                                                                       | No               | 0  |  |

*Please write down your observation note based on your observation (example: nappy not immediately washed after changed, mother might re-heat few foods, few not, mother might cleans few serving utensils few not, mother might have multiple exposure during feeding etc):*

**Thank you so much for your valuable time**

## Hand Hygiene Observation Form

Date :

HH ID :

District :

TA :

Village :

Observer Name :

| Op. | Person                                                                                                                                                                                                                      | Event                                                                                                                                                                                                                                                                                                                         | HH Action                                                                                                                                                                                                                                                 | Handwashing facility                                                                                                                                                                                                                                                                                     | HWF location                                                                                                                                                                                                       | Comments |
|-----|-----------------------------------------------------------------------------------------------------------------------------------------------------------------------------------------------------------------------------|-------------------------------------------------------------------------------------------------------------------------------------------------------------------------------------------------------------------------------------------------------------------------------------------------------------------------------|-----------------------------------------------------------------------------------------------------------------------------------------------------------------------------------------------------------------------------------------------------------|----------------------------------------------------------------------------------------------------------------------------------------------------------------------------------------------------------------------------------------------------------------------------------------------------------|--------------------------------------------------------------------------------------------------------------------------------------------------------------------------------------------------------------------|----------|
|     | <input type="checkbox"/> Mother<br><input type="checkbox"/> Sibling<br><input type="checkbox"/> Father<br><input type="checkbox"/> G/parent<br><input type="checkbox"/> Child<br><input type="checkbox"/> Other<br>Specify: | <input type="checkbox"/> child feeding<br><input type="checkbox"/> before eating<br><input type="checkbox"/> Food preparation<br><input type="checkbox"/> changing nappy<br><input type="checkbox"/> after latrine use<br><input type="checkbox"/> Touch dirty things:<br>Specify:<br><input type="checkbox"/> Other Specify: | <input type="checkbox"/> water only<br><input type="checkbox"/> water with soap<br><input type="checkbox"/> water with ash<br><input type="checkbox"/> water with sand<br><input type="checkbox"/> water with flour<br><input type="checkbox"/> No action | <input type="checkbox"/> Tippy tap<br><input type="checkbox"/> Jug and basin<br><input type="checkbox"/> bucket without tap<br><input type="checkbox"/> bucket with tap<br><input type="checkbox"/> cup only<br><input type="checkbox"/> Deep in basin/bucket<br><input type="checkbox"/> Other Specify: | <input type="checkbox"/> outside toilet<br><input type="checkbox"/> Under dish rack<br><input type="checkbox"/> in HH yard<br><input type="checkbox"/> Inside the house<br><input type="checkbox"/> Other Specify: |          |
| Op. | Person                                                                                                                                                                                                                      | Event                                                                                                                                                                                                                                                                                                                         | HH Action                                                                                                                                                                                                                                                 | Handwashing facility                                                                                                                                                                                                                                                                                     | HWF location                                                                                                                                                                                                       | Comments |
|     | <input type="checkbox"/> Mother<br><input type="checkbox"/> Sibling<br><input type="checkbox"/> Father<br><input type="checkbox"/> G/parent<br><input type="checkbox"/> Child<br><input type="checkbox"/> Other<br>Specify: | <input type="checkbox"/> child feeding<br><input type="checkbox"/> before eating<br><input type="checkbox"/> Food preparation<br><input type="checkbox"/> changing nappy<br><input type="checkbox"/> after latrine use<br><input type="checkbox"/> Touch dirty things:<br>Specify:<br><input type="checkbox"/> Other Specify: | <input type="checkbox"/> water only<br><input type="checkbox"/> water with soap<br><input type="checkbox"/> water with ash<br><input type="checkbox"/> water with sand<br><input type="checkbox"/> water with flour<br><input type="checkbox"/> No action | <input type="checkbox"/> Tippy tap<br><input type="checkbox"/> Jug and basin<br><input type="checkbox"/> bucket without tap<br><input type="checkbox"/> bucket with tap<br><input type="checkbox"/> cup only<br><input type="checkbox"/> Deep in basin/bucket<br><input type="checkbox"/> Other Specify: | <input type="checkbox"/> outside toilet<br><input type="checkbox"/> Under dish rack<br><input type="checkbox"/> in HH yard<br><input type="checkbox"/> Inside the house<br><input type="checkbox"/> Other Specify: |          |
| Op. | Person                                                                                                                                                                                                                      | Event                                                                                                                                                                                                                                                                                                                         | HH Action                                                                                                                                                                                                                                                 | Handwashing facility                                                                                                                                                                                                                                                                                     | HWF location                                                                                                                                                                                                       | Comments |

|                                                                                                                                                                                                                             |                                                                                                                                                                                                                                                                                                                               |                                                                                                                                                                                                                                                           |                                                                                                                                                                                                                                                                                                          |                                                                                                                                                                                                                    |                 |
|-----------------------------------------------------------------------------------------------------------------------------------------------------------------------------------------------------------------------------|-------------------------------------------------------------------------------------------------------------------------------------------------------------------------------------------------------------------------------------------------------------------------------------------------------------------------------|-----------------------------------------------------------------------------------------------------------------------------------------------------------------------------------------------------------------------------------------------------------|----------------------------------------------------------------------------------------------------------------------------------------------------------------------------------------------------------------------------------------------------------------------------------------------------------|--------------------------------------------------------------------------------------------------------------------------------------------------------------------------------------------------------------------|-----------------|
| <input type="checkbox"/> Mother<br><input type="checkbox"/> Sibling<br><input type="checkbox"/> Father<br><input type="checkbox"/> G/parent<br><input type="checkbox"/> Child<br><input type="checkbox"/> Other<br>Specify: | <input type="checkbox"/> child feeding<br><input type="checkbox"/> before eating<br><input type="checkbox"/> Food preparation<br><input type="checkbox"/> changing nappy<br><input type="checkbox"/> after latrine use<br><input type="checkbox"/> Touch dirty things:<br>Specify:<br><input type="checkbox"/> Other Specify: | <input type="checkbox"/> water only<br><input type="checkbox"/> water with soap<br><input type="checkbox"/> water with ash<br><input type="checkbox"/> water with sand<br><input type="checkbox"/> water with flour<br><input type="checkbox"/> No action | <input type="checkbox"/> Tippy tap<br><input type="checkbox"/> Jug and basin<br><input type="checkbox"/> bucket without tap<br><input type="checkbox"/> bucket with tap<br><input type="checkbox"/> cup only<br><input type="checkbox"/> Deep in basin/bucket<br><input type="checkbox"/> Other Specify: | <input type="checkbox"/> outside toilet<br><input type="checkbox"/> Under dish rack<br><input type="checkbox"/> in HH yard<br><input type="checkbox"/> Inside the house<br><input type="checkbox"/> Other Specify: |                 |
| <b>Op. Person</b>                                                                                                                                                                                                           | <b>Event</b>                                                                                                                                                                                                                                                                                                                  | <b>HH Action</b>                                                                                                                                                                                                                                          | <b>Handwashing facility</b>                                                                                                                                                                                                                                                                              | <b>HWF location</b>                                                                                                                                                                                                | <b>Comments</b> |
| <input type="checkbox"/> Mother<br><input type="checkbox"/> Sibling<br><input type="checkbox"/> Father<br><input type="checkbox"/> G/parent<br><input type="checkbox"/> Child<br><input type="checkbox"/> Other<br>Specify: | <input type="checkbox"/> child feeding<br><input type="checkbox"/> before eating<br><input type="checkbox"/> Food preparation<br><input type="checkbox"/> changing nappy<br><input type="checkbox"/> after latrine use<br><input type="checkbox"/> Touch dirty things:<br>Specify:<br><input type="checkbox"/> Other Specify: | <input type="checkbox"/> water only<br><input type="checkbox"/> water with soap<br><input type="checkbox"/> water with ash<br><input type="checkbox"/> water with sand<br><input type="checkbox"/> water with flour<br><input type="checkbox"/> No action | <input type="checkbox"/> Tippy tap<br><input type="checkbox"/> Jug and basin<br><input type="checkbox"/> bucket without tap<br><input type="checkbox"/> bucket with tap<br><input type="checkbox"/> cup only<br><input type="checkbox"/> Deep in basin/bucket<br><input type="checkbox"/> Other Specify: | <input type="checkbox"/> outside toilet<br><input type="checkbox"/> Under dish rack<br><input type="checkbox"/> in HH yard<br><input type="checkbox"/> Inside the house<br><input type="checkbox"/> Other Specify: |                 |
